# Supplementary material for: An unprecedented Cu6 cluster-based bimetallic MOF with multiple open sites for high CO2 capture and efficient CO2 conversion
Source: Royal Society of Chemistry journal article supplement (doi:10.1039/d4qi00692e), 2024-01-01
Supplement: d4qi00692e1.pdf [file d4qi00692e1.pdf]

## Electronic Supplementary Information (ESI)

### An Unprecedented Cu<sub>6</sub> Cluster-Based Bimetallic MOF with Multiple Open Sites for High CO<sub>2</sub> Capture and Efficient CO<sub>2</sub> Conversion

Xueyue Yu<sup>a</sup>, Jiaming Gu<sup>a</sup>, Baobing Tang<sup>a</sup>, Tong Xu<sup>a</sup>, Guanghua Li<sup>a</sup>, Zhiyong Chang<sup>\*b, c</sup> and Yunling Liu<sup>\*a</sup>

<sup>a</sup> State Key Laboratory of Inorganic Synthesis and Preparative Chemistry, College of Chemistry, Jilin University, Changchun 130012, P. R. China

<sup>b</sup> Key Laboratory of Bionic Engineering, Ministry of Education, Jilin University, Changchun 130022, P. R. China

<sup>c</sup> College of Biological and Agricultural Engineering, Jilin University, Changchun 130022, P. R. China

*E-mail: yunling@jlu.edu.cn, zychang@jlu.edu.cn*

### Table of Contents

|                                                                                                                                                                                     |     |
|-------------------------------------------------------------------------------------------------------------------------------------------------------------------------------------|-----|
| <b>S1. Calculation procedures of selectivity from IAST</b> .....                                                                                                                    | S2  |
| <b>S2. Details of experiments and calculation procedures of catalytic efficiency</b> .....                                                                                          | S2  |
| <b>S3. Supporting Figures</b> .....                                                                                                                                                 | S4  |
| <b>Figure S1</b> The copper SBU and indium SBU in the structure of <b>JLU-MOF108</b> .....                                                                                          | S4  |
| <b>Figure S2</b> Space-filling view of <b>JLU-MOF108</b> with multiple pores in different directions.....                                                                           | S4  |
| <b>Figure S3</b> PXRD patterns of <b>JLU-MOF108</b> soaking in different organic solvents. ....                                                                                     | S4  |
| <b>Figure S4</b> Thermogravimetric analysis curves of <b>JLU-MOF108</b> for the as-synthesized sample and methanol exchanged sample. ....                                           | S5  |
| <b>Figure S5</b> Pore size distribution of <b>JLU-MOF108</b> .....                                                                                                                  | S5  |
| <b>Figure S6-S9</b> Gas adsorption isotherms of <b>JLU-MOF108</b> and calculating $Q_{st}$ .....                                                                                    | S5  |
| <b>Figure S10</b> Gas adsorption isotherms with DSLF fits and IAST selectivity for <b>JLU-MOF108</b> . ..                                                                           | S7  |
| <b>Figure S11</b> PXRD patterns of <b>JLU-MOF108</b> after 4 times recycled.....                                                                                                    | S8  |
| <b>Figure S12</b> IR spectra and XPS spectra of <b>JLU-MOF108</b> after 4 times recycled. ....                                                                                      | S8  |
| <b>Figure S13-S18</b> <sup>1</sup> H NMR spectrum of the mixture catalyzed by <b>JLU-MOF108</b> . ....                                                                              | S9  |
| <b>S4. Supporting Tables</b> .....                                                                                                                                                  | S12 |
| <b>Table S1.</b> Crystal data and structure refinements for <b>JLU-MOF108</b> . ....                                                                                                | S12 |
| <b>Table S2.</b> Selected bond lengths [Å] and angles [°] for <b>JLU-MOF108</b> . ....                                                                                              | S13 |
| <b>Table S3.</b> Comparisons of CO <sub>2</sub> uptakes for selected MOFs materials (at 273 K). ....                                                                                | S15 |
| <b>Table S4.</b> Comparisons of CO <sub>2</sub> uptakes for selected MOFs materials (at 298 K). ....                                                                                | S15 |
| <b>Table S5.</b> Comparisons of some reported MOFs-based catalysts in cycloaddition reaction of CO <sub>2</sub> with ECH under respectively optimized conditions <sup>a</sup> ..... | S16 |
| <b>Table S6.</b> Sizes of epoxides selected for the experiments. ....                                                                                                               | S17 |
| <b>Table S7.</b> ICP-OES analysis of Cu <sup>2+</sup> and In <sup>3+</sup> after the 4 times recycled reaction. ....                                                                | S17 |
| <b>References</b> .....                                                                                                                                                             | S17 |

## S1. Calculation procedures of selectivity from IAST

The measured experimental data is excess loadings ( $q^{ex}$ ) of the pure components CO<sub>2</sub>, CH<sub>4</sub>, C<sub>2</sub>H<sub>6</sub> and C<sub>3</sub>H<sub>8</sub> for **JLU-MOF108**, which should be converted to absolute loadings ( $q$ ) firstly.

$$q = q^{ex} + \frac{pV_{pore}}{ZRT} \quad (1)$$

Here  $Z$  is the compressibility factor. The Peng-Robinson equation (Eq. 1) is used to estimate the value of compressibility factor to obtain the absolute loading, while the measure pore volume is also necessary.

The dual-site Langmuir-Freundlich equation (Eq. 2) is used for fitting the isotherm data at 298 K.

$$q = q_{m1} \times \frac{b_1 \times p^{1/n_1}}{1 + b_1 \times p^{1/n_1}} + q_{m2} \times \frac{b_2 \times p^{1/n_2}}{1 + b_2 \times p^{1/n_2}} \quad (2)$$

Here  $p$  is the pressure of the bulk gas at equilibrium with the adsorbed phase (kPa),  $q$  is the adsorbed amount per mass of adsorbent (mol kg<sup>-1</sup>),  $q_{m1}$  and  $q_{m2}$  are the saturation capacities of sites 1 and 2 (mol kg<sup>-1</sup>),  $b_1$  and  $b_2$  are the affinity coefficients of sites 1 and 2 (1/kPa),  $n_1$  and  $n_2$  are the deviations from an ideal homogeneous surface.

$$S = \frac{q_1/q_2}{p_1/p_2} \quad (3)$$

The selectivity of preferential adsorption of component 1 over component 2 in a mixture containing 1 and 2, perhaps in the presence of other components too, can be formally defined as  $q_1$  and  $q_2$  are the absolute component loadings of the adsorbed phase in the mixture. These component loadings are also termed the uptake capacities. We calculate the values of  $q_1$  and  $q_2$  using the Ideal Adsorbed Solution Theory (IAST) of Myers and Prausnitz (Eq. 3).

## S2. Details of experiments and calculation procedures of catalytic efficiency

In a typical catalytic reaction, epoxide (20 mmol), TBAB (1 mmol, 5 mol %), activated **JLU-MOF108** (0.25 mol % open Cu sites) were put into a 15 mL Schlenk tube with solvent free environment. To activate the MOFs materials, the as-synthesized samples were activated with the exchange of methanol solvent 12 times in 2 days. After that, the samples were dried in the vacuum condition for 10 h at 70 °C and collected the MOFs for further cycloaddition reaction.

Before the reaction, pump out the air inside Schlenk tube/high pressure reactor and fill in pure CO<sub>2</sub>. After 3 times pump-fill procedure, turn to specific conditions (1 bar, 25°C for PO and 80 °C for other epoxides in Schlenk tube). The stirring speed was 400 rpm (the speed could slow down for PO in order to reduce PO's low-boiling-point volatilization in continuous stirring). After centrifuging to recycle the catalyst, a little supernatant reaction mixture was taken to analyze by <sup>1</sup>H-NMR.

The yields of PO, 1, 2-epoxy-3-phenoxypropane, glycidyl-2-methylphenyl ether and cyclohexene oxide (H<sub>a</sub> for epoxides and H<sub>a'</sub> for carbonates, respectively) catalyzed by **JLU-MOF108** were calculated according to the following equation (Eq. 4).

$$Yield(\%) = \frac{I_{H_{a'}}}{I_{H_a} + I_{H_{a'}}} \times 100\% \quad (4)$$

The yield of SO to styrene carbonate were determined by calculation of the  $^1\text{H}$  NMR integrals of corresponding highlighted protons in styrene oxide ( $\text{H}_a$ ), styrene carbonate ( $\text{H}_a'$ ) and phenyl group ( $\text{H}_b$ - $\text{H}_f$ ) (from SO, styrene carbonate and other by-products) according to the following equation (Eq. 5).

$$\text{Yield}(\%) = \frac{5 \times I_{\text{H}_a'}}{I_{\text{H}_b - \text{H}_f}} \times 100\% \quad (5)$$

The calculation of TON (turnover number) and TOF (turnover frequency) values are according to the following equations:

$$\text{TON} = \frac{N_{\text{Product}}(\text{mmol})}{N_{\text{MOF}}(\text{mmol})}$$

$$\text{TOF}(\text{h}^{-1}) = \frac{N_{\text{Product}}(\text{mmol})}{N_{\text{MOF}}(\text{mmol}) \times \text{time}(\text{h})}$$

### S3. Supporting Figures

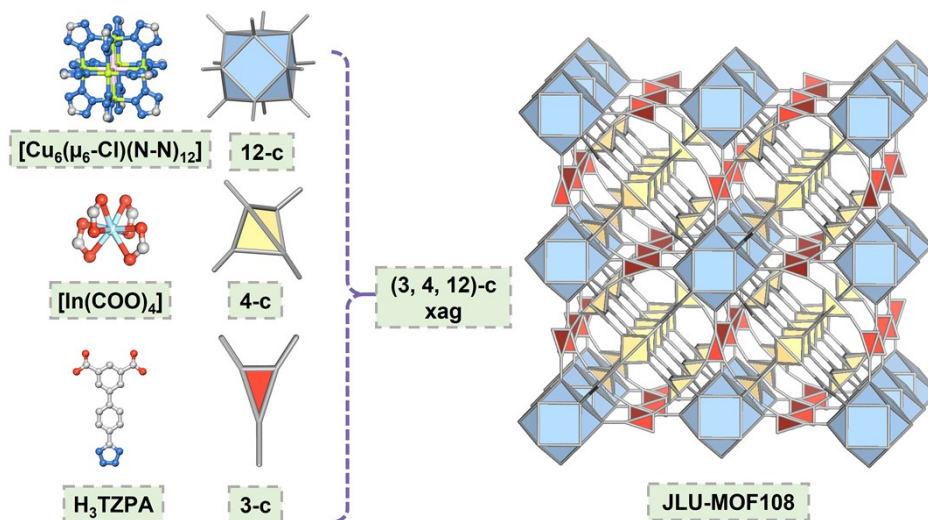

Figure S1 The hexa-nuclear copper cluster SBU and indium SBU in the structure of JLU-MOF108.

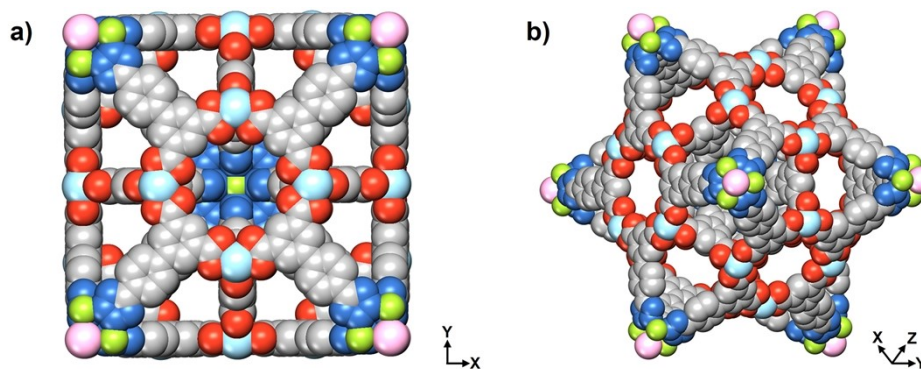

Figure S2 Space-filling view of JLU-MOF108 with multiple pores along the [001] (a) and [111] (b) direction, respectively.

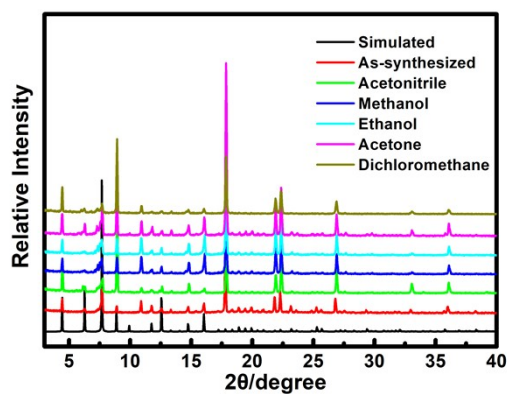

Figure S3 PXRD patterns of JLU-MOF108 soaking in different organic solvents.

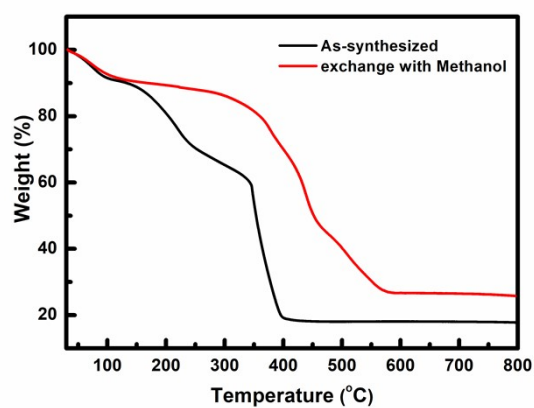

**Figure S4** Thermogravimetric analysis curves of **JLU-MOF108** for the as-synthesized sample and methanol exchanged sample.

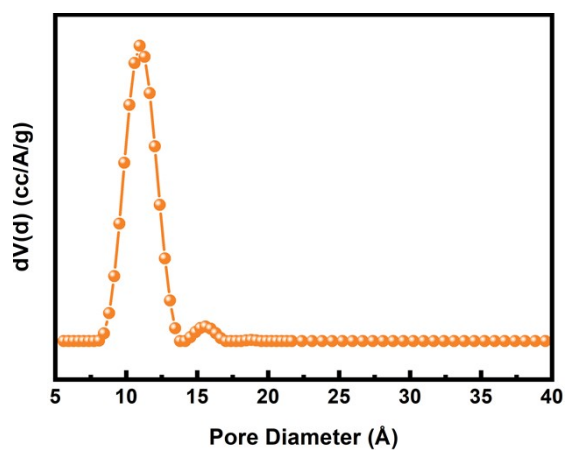

**Figure S5** Pore size distribution of **JLU-MOF108**.

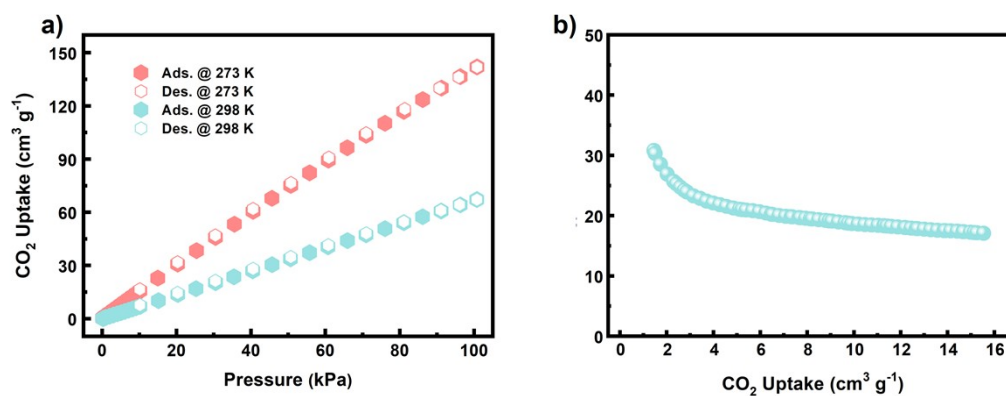

**Figure S6** (a)  $\text{CO}_2$  adsorption isotherms of **JLU-MOF108** at 273 K and 298 K; (b)  $Q_{\text{st}}$  of  $\text{CO}_2$  for **JLU-MOF108**.

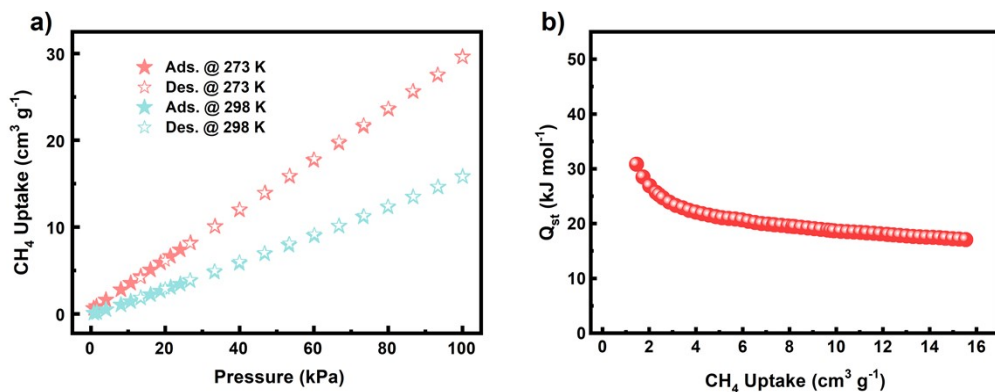

Figure S7 (a) CH<sub>4</sub> adsorption isotherms of **JLU-MOF108** at 273 K and 298 K; (b)  $Q_{st}$  of CH<sub>4</sub> for **JLU-MOF108**.

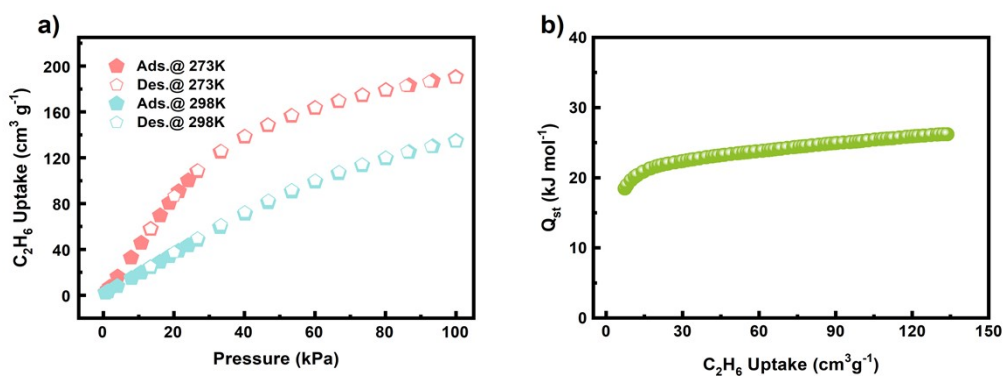

Figure S8 (a) C<sub>2</sub>H<sub>6</sub> adsorption isotherms of **JLU-MOF108** at 273 K and 298 K; (b)  $Q_{st}$  of C<sub>2</sub>H<sub>6</sub> for **JLU-MOF108**.

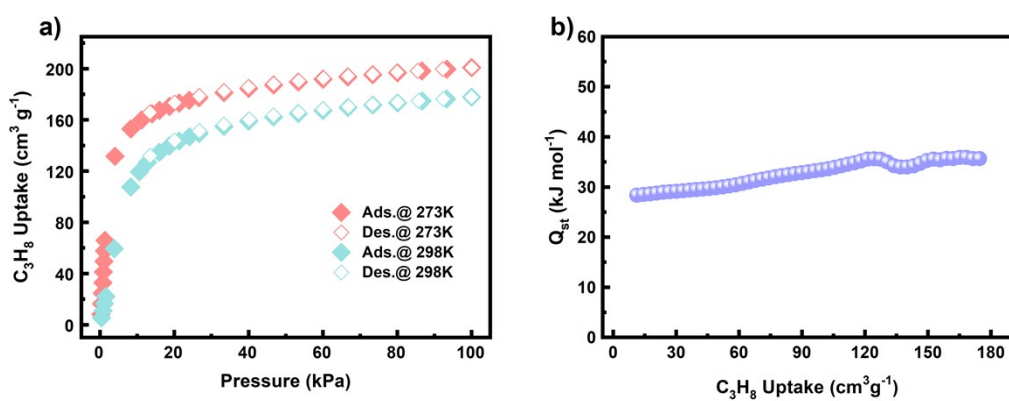

Figure S9 (a) C<sub>3</sub>H<sub>8</sub> adsorption isotherms of **JLU-MOF108** at 273 K and 298 K; (b)  $Q_{st}$  of C<sub>3</sub>H<sub>8</sub> for **JLU-MOF108**.

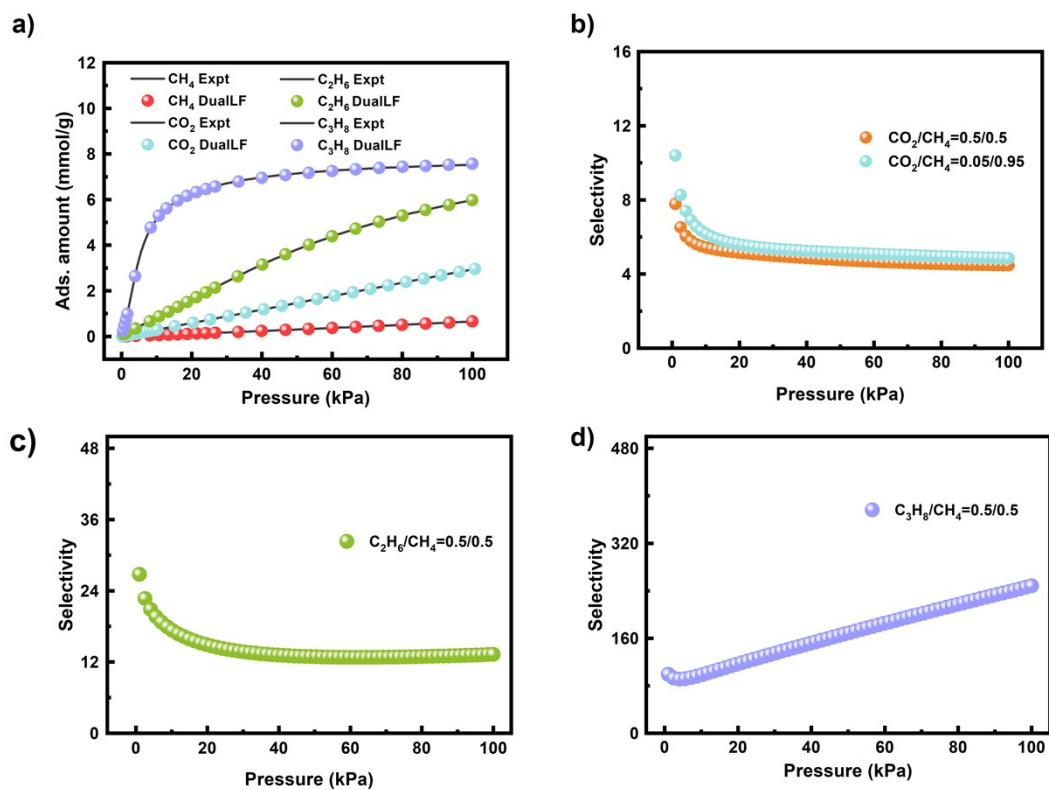

**Figure S10** Gas adsorption isotherms at 298 K along with the dual-site Langmuir Freundlich (DSLFF) fits (a) and adsorption selectivity predicted by the ideal adsorbed solution theory (IAST) at 298 K, 1 atm for JLU-MOF108 (b, c and d).

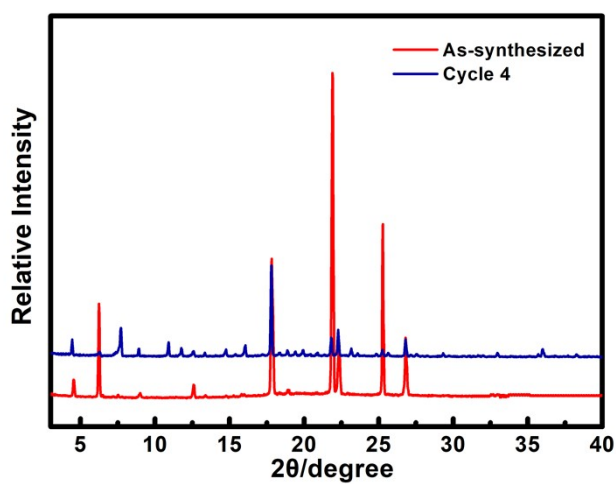

Figure S11 PXRD patterns of **JLU-MOF108** after 4 times recycled.

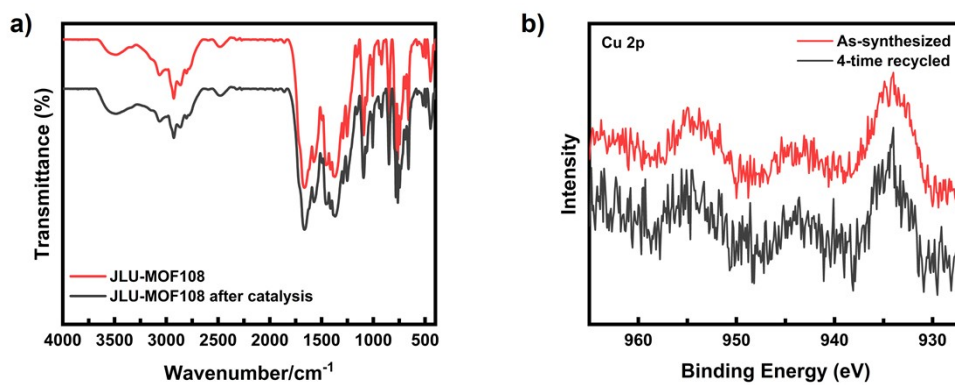

Figure S12 (a) IR spectra of **JLU-MOF108** and after 4 times recycled. (b) XPS spectra of **JLU-MOF108** and after 4 times recycled.



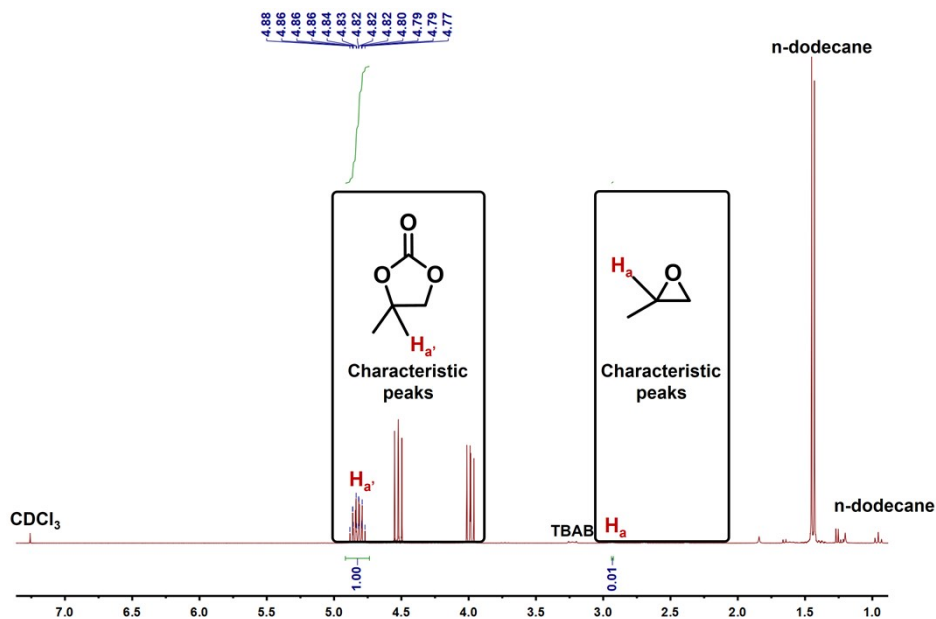

**Figure S13**  $^1\text{H}$  NMR spectrum of the mixture produced by cycloaddition reaction of propylene oxide catalyzed by **JLU-MOF108** in  $\text{CDCl}_3$ . n-dodecane was used as internal standard.

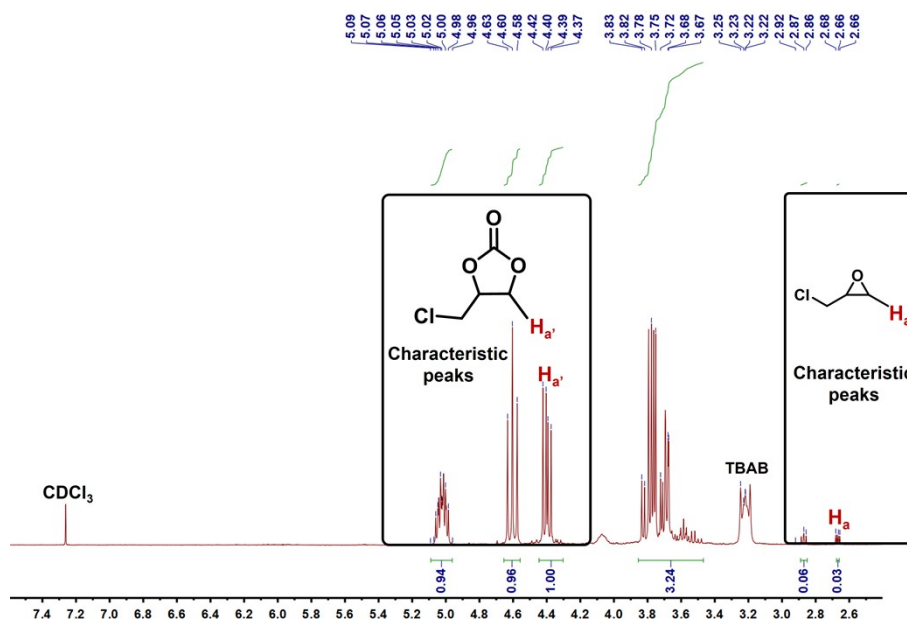

**Figure S14**  $^1\text{H}$  NMR spectrum of the mixture produced by cycloaddition reaction of epichlorohydrin catalyzed by **JLU-MOF108** in  $\text{CDCl}_3$ . n-dodecane was used as internal standard.

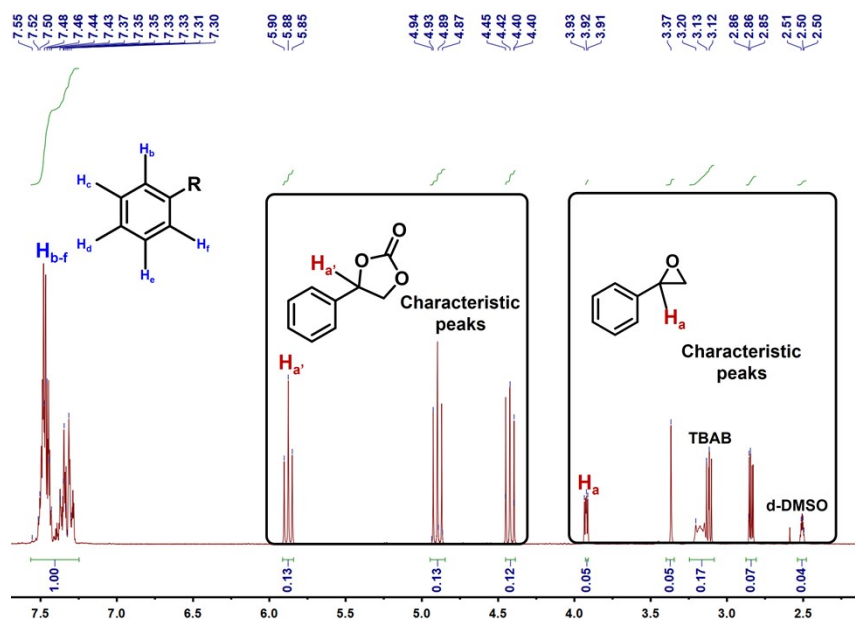

**Figure S15**  $^1\text{H}$  NMR spectrum of the mixture produced by cycloaddition reaction of styrene oxide catalyzed by **JLU-MOF108** in d-DMSO.

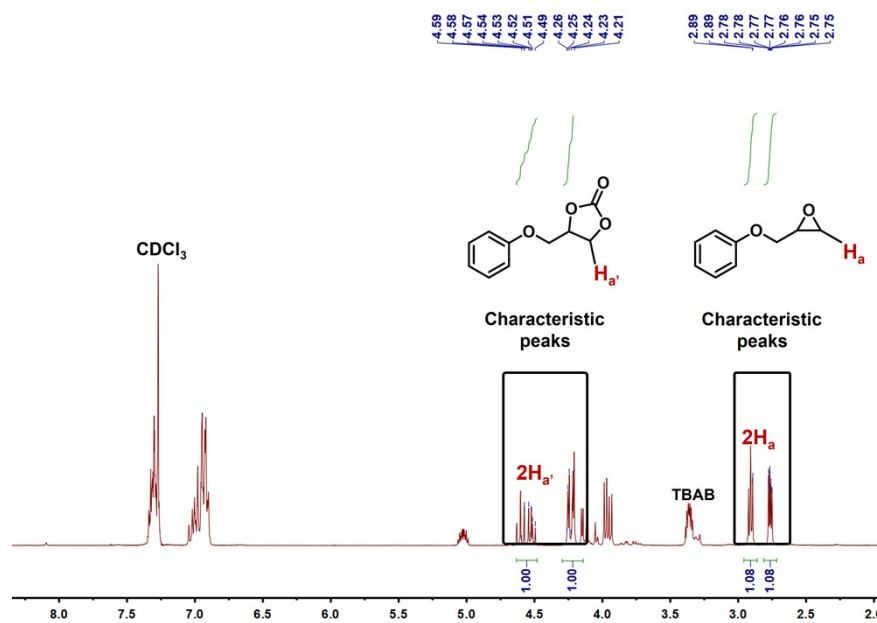

**Figure S16**  $^1\text{H}$  NMR spectrum of the mixture produced by cycloaddition reaction of 1, 2-epoxy-3-phenoxypropane catalyzed by **JLU-MOF108** in  $\text{CDCl}_3$ .

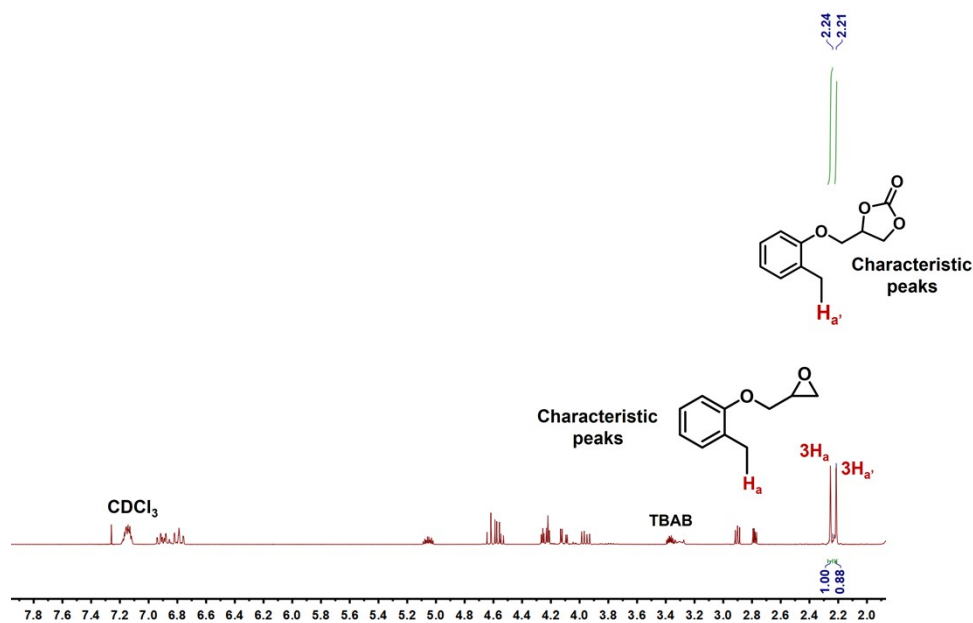

**Figure S17**  $^1H$  NMR spectrum of the mixture produced by cycloaddition reaction of glycidyl-2-methylphenyl ether catalyzed by **JLU-MOF108** in CDCl<sub>3</sub>.

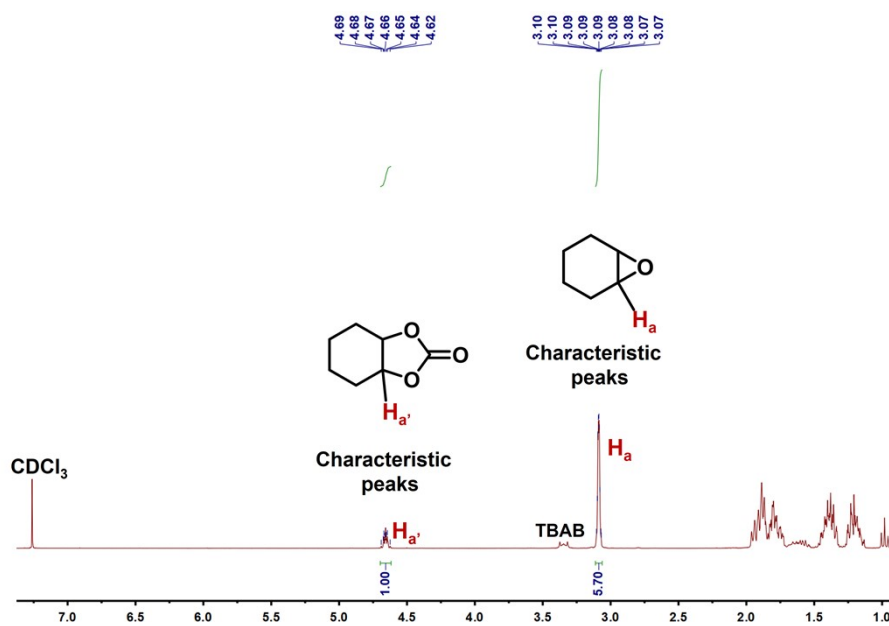

**Figure S18**  $^1H$  NMR spectrum of the mixture produced by cycloaddition reaction of cyclohexene oxide catalyzed by **JLU-MOF108** in CDCl<sub>3</sub>.

## S4. Supporting Tables

**Table S1.** Crystal data and structure refinements for **JLU-MOF108**.

| compound                                                                    | JLU-MOF108                               |
|-----------------------------------------------------------------------------|------------------------------------------|
| Formula                                                                     | $C_{221}H_{203}ClCu_6In_6N_{61}O_{60.5}$ |
| Formula weight                                                              | 5829.07                                  |
| Temperature (K)                                                             | 293(2)                                   |
| Wavelength (Å)                                                              | 0.71073                                  |
| Crystal system                                                              | Cubic                                    |
| Space group                                                                 | <i>Im-3m</i>                             |
| <i>a</i> (Å)                                                                | 28.162(3)                                |
| <i>b</i> (Å)                                                                | 28.162(3)                                |
| <i>c</i> (Å)                                                                | 28.162(3)                                |
| $\alpha$ (°)                                                                | 90                                       |
| $\beta$ (°)                                                                 | 90                                       |
| $\gamma$ (°)                                                                | 90                                       |
| <i>V</i> (Å <sup>3</sup> )                                                  | 22335(8)                                 |
| <i>Z</i> , <i>D<sub>c</sub></i> (Mg/m <sup>3</sup> )                        | 2, 0.867                                 |
| <i>F</i> (000)                                                              | 5892                                     |
| $\vartheta$ range (deg)                                                     | 1.023-25.051                             |
| reflns collected/unique                                                     | 64267/1932                               |
| <i>R<sub>int</sub></i>                                                      | 0.0612                                   |
| data/restraints/params                                                      | 1932/24/83                               |
| GOF on <i>F</i> <sup>2</sup>                                                | 1.065                                    |
| <i>R</i> <sub>1</sub> , <i>wR</i> <sub>2</sub> ( <i>I</i> > 2σ( <i>I</i> )) | 0.0418, 0.1256                           |
| <i>R</i> <sub>1</sub> , <i>wR</i> <sub>2</sub> (all data)                   | 0.0503, 0.1317                           |
| CCDC No.                                                                    | 2338522                                  |

**Table S2.** Selected bond lengths [Å] and angles [°] for **JLU-MOF108**.

| <b>JLU-MOF108</b>   |            |                       |            |
|---------------------|------------|-----------------------|------------|
| In(1)-O(2)          | 2.200(3)   | O(2)#3-In(1)-O(1)     | 134.35(10) |
| In(1)-O(2)#1        | 2.200(3)   | O(1)#3-In(1)-O(1)     | 77.98(13)  |
| In(1)-O(2)#2        | 2.200(3)   | O(1)#2-In(1)-O(1)     | 127.16(8)  |
| In(1)-O(2)#3        | 2.200(3)   | O(1)#1-In(1)-O(1)     | 127.16(8)  |
| In(1)-O(1)#3        | 2.390(3)   | O(2)-In(1)-C(10)#2    | 87.88(3)   |
| In(1)-O(1)#2        | 2.390(3)   | O(2)#1-In(1)-C(10)#2  | 162.03(13) |
| In(1)-O(1)#1        | 2.390(3)   | O(2)#2-In(1)-C(10)#2  | 28.70(12)  |
| In(1)-O(1)          | 2.390(3)   | O(2)#3-In(1)-C(10)#2  | 87.88(3)   |
| In(1)-C(10)#2       | 2.644(4)   | O(1)#3-In(1)-C(10)#2  | 107.93(8)  |
| In(1)-C(10)#3       | 2.644(4)   | O(1)#2-In(1)-C(10)#2  | 27.67(11)  |
| In(1)-C(10)#1       | 2.644(4)   | O(1)#1-In(1)-C(10)#2  | 105.66(12) |
| In(1)-C(10)         | 2.644(4)   | O(1)-In(1)-C(10)#2    | 107.93(8)  |
| Cu(1)-N(2)#4        | 1.975(3)   | O(2)-In(1)-C(10)#3    | 162.03(13) |
| Cu(1)-N(2)#5        | 1.975(3)   | O(2)#1-In(1)-C(10)#3  | 87.88(3)   |
| Cu(1)-N(2)#6        | 1.975(3)   | O(2)#2-In(1)-C(10)#3  | 87.88(3)   |
| Cu(1)-N(2)          | 1.975(3)   | O(2)#3-In(1)-C(10)#3  | 28.70(12)  |
| Cu(1)-Cl(1)         | 2.7176(9)  | O(1)#3-In(1)-C(10)#3  | 27.67(11)  |
| O(2)-In(1)-O(2)#1   | 90.500(15) | O(1)#2-In(1)-C(10)#3  | 107.93(8)  |
| O(2)-In(1)-O(2)#2   | 90.500(15) | O(1)#1-In(1)-C(10)#3  | 107.93(8)  |
| O(2)#1-In(1)-O(2)#2 | 169.28(16) | O(1)-In(1)-C(10)#3    | 105.66(12) |
| O(2)-In(1)-O(2)#3   | 169.28(16) | C(10)#2-In(1)-C(10)#3 | 99.03(7)   |
| O(2)#1-In(1)-O(2)#3 | 90.500(15) | O(2)-In(1)-C(10)#1    | 87.88(3)   |
| O(2)#2-In(1)-O(2)#3 | 90.500(15) | O(2)#1-In(1)-C(10)#1  | 28.70(12)  |
| O(2)-In(1)-O(1)#3   | 134.35(10) | O(2)#2-In(1)-C(10)#1  | 162.03(13) |
| O(2)#1-In(1)-O(1)#3 | 85.83(6)   | O(2)#3-In(1)-C(10)#1  | 87.88(3)   |
| O(2)#2-In(1)-O(1)#3 | 85.83(6)   | O(1)#3-In(1)-C(10)#1  | 107.93(8)  |
| O(2)#3-In(1)-O(1)#3 | 56.37(10)  | O(1)#2-In(1)-C(10)#1  | 105.66(12) |
| O(2)-In(1)-O(1)#2   | 85.83(6)   | O(1)#1-In(1)-C(10)#1  | 27.67(11)  |
| O(2)#1-In(1)-O(1)#2 | 134.35(10) | O(1)-In(1)-C(10)#1    | 107.93(8)  |
| O(2)#2-In(1)-O(1)#2 | 56.37(10)  | C(10)#2-In(1)-C(10)#1 | 133.33(19) |
| O(2)#3-In(1)-O(1)#2 | 85.83(6)   | C(10)#3-In(1)-C(10)#1 | 99.03(7)   |
| O(1)#3-In(1)-O(1)#2 | 127.16(8)  | O(2)-In(1)-C(10)      | 28.70(12)  |
| O(2)-In(1)-O(1)#1   | 85.83(6)   | O(2)#1-In(1)-C(10)    | 87.88(3)   |
| O(2)#1-In(1)-O(1)#1 | 56.37(10)  | O(2)#2-In(1)-C(10)    | 87.88(3)   |
| O(2)#2-In(1)-O(1)#1 | 134.35(10) | O(2)#3-In(1)-C(10)    | 162.02(13) |
| O(2)#3-In(1)-O(1)#1 | 85.83(6)   | O(1)#3-In(1)-C(10)    | 105.65(12) |
| O(1)#3-In(1)-O(1)#1 | 127.16(8)  | O(1)#2-In(1)-C(10)    | 107.93(8)  |
| O(1)#2-In(1)-O(1)#1 | 77.98(13)  | O(1)#1-In(1)-C(10)    | 107.93(8)  |
| O(2)-In(1)-O(1)     | 56.37(10)  | O(1)-In(1)-C(10)      | 27.67(11)  |
| O(2)#1-In(1)-O(1)   | 85.83(6)   | C(10)#2-In(1)-C(10)   | 99.03(7)   |
| O(2)#2-In(1)-O(1)   | 85.83(6)   | C(10)#3-In(1)-C(10)   | 133.33(19) |

|                         |            |                         |         |
|-------------------------|------------|-------------------------|---------|
| C(10)#3-In(1)-C(10)     | 133.33(19) | Cu(1)#10-Cl(1)-Cu(1)#13 | 90.0    |
| C(10)#1-In(1)-C(10)     | 99.03(7)   | Cu(1)#11-Cl(1)-Cu(1)#13 | 90.0    |
| N(2)#4-Cu(1)-N(2)#5     | 170.23(19) | Cu(1)#12-Cl(1)-Cu(1)#13 | 90.0    |
| N(2)#4-Cu(1)-N(2)#6     | 89.585(17) | Cu(1)#10-Cl(1)-Cu(1)#14 | 90.0    |
| N(2)#5-Cu(1)-N(2)#6     | 89.584(17) | Cu(1)#11-Cl(1)-Cu(1)#14 | 90.0    |
| N(2)#4-Cu(1)-N(2)       | 89.584(17) | Cu(1)#12-Cl(1)-Cu(1)#14 | 90.0    |
| N(2)#5-Cu(1)-N(2)       | 89.584(17) | Cu(1)#13-Cl(1)-Cu(1)#14 | 180.0   |
| N(2)#6-Cu(1)-N(2)       | 170.23(19) | Cu(1)#10-Cl(1)-Cu(1)    | 90.0    |
| N(2)#4-Cu(1)-Cl(1)      | 94.89(10)  | Cu(1)#11-Cl(1)-Cu(1)    | 90.0    |
| N(2)#5-Cu(1)-Cl(1)      | 94.89(10)  | Cu(1)#12-Cl(1)-Cu(1)    | 180.0   |
| N(2)#6-Cu(1)-Cl(1)      | 94.89(10)  | Cu(1)#13-Cl(1)-Cu(1)    | 90.0    |
| N(2)-Cu(1)-Cl(1)        | 94.89(10)  | Cu(1)#14-Cl(1)-Cu(1)    | 90.0    |
| Cu(1)#10-Cl(1)-Cu(1)#11 | 180.0      | C(10)-O(1)-In(1)        | 87.7(3) |
| Cu(1)#10-Cl(1)-Cu(1)#12 | 90.0       | C(10)-O(2)-In(1)        | 95.4(3) |
| Cu(1)#11-Cl(1)-Cu(1)#12 | 90.0       |                         |         |

Symmetry transformations used to generate equivalent atoms:

#1 -z+1/2,-y+1/2,x-1/2 #2 z+1/2,-y+1/2,x-1/2 #3 x,y,-z #4 y,x,z #5 -y+1,-x+1,z #6 -x+1,-y+1,z #7 -x+1,z,y #8 -x+1,y,z #9 x,z,y #10 -y+1,-z+1,-x+1 #11 y,z,x #12 -x+1,-y+1,-z+1 #13 z,x,y #14 -z+1,-x+1,-y+1

**Table S3.** Comparisons of CO<sub>2</sub> uptakes for selected MOFs materials (under 1 atm, at 273 K).

| Compounds                           | 273 K CO <sub>2</sub> uptake (mmol g <sup>-1</sup> ) | Reference |
|-------------------------------------|------------------------------------------------------|-----------|
| ZJU-12                              | 10.6                                                 | 1         |
| Cu-TDPAT                            | 10.1                                                 | 2         |
| JLU-Liu21                           | 9.3                                                  | 3         |
| Cu <sub>2</sub> (abtc) <sub>3</sub> | 8.7                                                  | 4         |
| CPM-733                             | 7.6                                                  | 5         |
| JLU-MOF107                          | 7.6                                                  | 6         |
| JLU-Liu20                           | 7.2                                                  | 3         |
| JLU-MOF108                          | 6.3                                                  | This work |
| CPM-33a                             | 6.1                                                  | 7         |
| IFMC                                | 4.1                                                  | 8         |
| NH <sub>2</sub> -MIL-125            | 4.0                                                  | 9         |
| USTC-253                            | 3.7                                                  | 10        |
| UiO-66-AD4                          | 3.6                                                  | 11        |
| SNU-M10                             | 3.3                                                  | 12        |
| MAF-23                              | 3.3                                                  | 13        |
| 1                                   | 2.8                                                  | 14        |
| TMOF-1                              | 2.2                                                  | 15        |
| SNU-5                               | 0.9                                                  | 4         |

**Table S4.** Comparisons of CO<sub>2</sub> uptakes for selected MOFs materials (under 1 atm, at 298 K).

| Compounds                   | 298 K CO <sub>2</sub> uptake (mmol g <sup>-1</sup> ) | Reference |
|-----------------------------|------------------------------------------------------|-----------|
| Li@HKUST-1                  | 10.6                                                 | 16        |
| Ni-4PyC                     | 8.2                                                  | 17        |
| CPO-27-Mg                   | 7.1                                                  | 18        |
| JLU-Liu21                   | 5.5                                                  | 3         |
| JLU-MOF107                  | 4.7                                                  | 6         |
| JLU-MOF108                  | 3.0                                                  | This work |
| SIFSIX-3-Ni                 | 2.8                                                  | 19        |
| FS-CuBTC <sub>UM</sub>      | 2.7                                                  | 20        |
| MAF-23                      | 2.5                                                  | 13        |
| Zn-atz-oba                  | 2.5                                                  | 21        |
| SU-101                      | 2.4                                                  | 22        |
| JNU-2                       | 2.2                                                  | 23        |
| TIFSIX-3-Ni                 | 2.1                                                  | 24        |
| LIFM-210                    | 2.0                                                  | 25        |
| ZNU-1                       | 1.7                                                  | 26        |
| NH <sub>2</sub> -MIL-53(Al) | 1.5                                                  | 27        |
| F-PYMO-Cu                   | 1.4                                                  | 28        |

**Table S5.** Comparisons of some reported MOFs-based catalysts in cycloaddition reaction of CO<sub>2</sub> with ECH under respectively optimized conditions <sup>a</sup>.

| MOFs-based catalyst                                                                                      | T/°C      | P/bar    | t/h       | Yield/%        | TOF/h <sup>-1</sup> | Ref.             |
|----------------------------------------------------------------------------------------------------------|-----------|----------|-----------|----------------|---------------------|------------------|
| VPI-100(Ni)                                                                                              | 90        | 10       | 6         | 98             | 75.0                | 29               |
| VPI-100(Cu)                                                                                              | 90        | 10       | 6         | 95             | 72.6                | 29               |
| PIP-Bn-Cl                                                                                                | 100       | 1        | 3         | > 99           | 71.9                | 30               |
| Hf-VPI-100(Cu)                                                                                           | 90        | 1.5      | 6         | 97             | 63.4                | 31               |
| Hf-VPI-100(Ni)                                                                                           | 90        | 1.5      | 6         | 90             | 58.4                | 31               |
| Zn <sub>0.75</sub> Mg <sub>0.25</sub> -MOF-74                                                            | 60        | 8        | 5         | 98             | 33.2                | 32               |
| <b>JLU-MOF108</b>                                                                                        | <b>80</b> | <b>1</b> | <b>12</b> | <b>97</b>      | <b>32.3</b>         | <b>This work</b> |
| <b>Compound 2</b>                                                                                        | <b>80</b> | <b>1</b> | <b>12</b> | <b>96</b>      | <b>32.0</b>         | <b>33</b>        |
| <b>1</b>                                                                                                 | <b>28</b> | <b>1</b> | <b>16</b> | <b>&gt; 99</b> | <b>25.0</b>         | <b>34</b>        |
| PCN-700-Me <sub>2</sub>                                                                                  | 50        | 1        | 10        | 92             | 24.2                | 35               |
| Mn-MOF-1a                                                                                                | 80        | 4        | 12        | 96             | 21.3                | 36               |
| FJI-C10                                                                                                  | 60        | 1        | 24        | 87             | 20.6                | 37               |
| MIL-IMAc-Br <sup>-</sup>                                                                                 | 60        | 5        | 20        | 89.1           | 19.7                | 38               |
| PCP-33                                                                                                   | 80        | 1        | 12        | 79             | 13.0                | 39               |
| FJI-H14                                                                                                  | 80        | 1        | 24        | 95             | 8.2                 | 40               |
| JLU-Liu21                                                                                                | 80        | 1        | 48        | 92             | 7.7                 | 41               |
| PCP-34                                                                                                   | 80        | 1        | 12        | 72             | 6.0                 | 39               |
| PNU-25-NH <sub>2</sub>                                                                                   | 55        | 1        | 18        | 92             | 5.1                 | 42               |
| [Zn(chdc)(L)] H <sub>2</sub> O                                                                           | 80        | 10       | 18        | 91             | 2.8                 | 43               |
| Gd <sub>7</sub> (cda) <sub>6</sub> (HCOO) <sub>3</sub> (OH) <sub>6</sub> (H <sub>2</sub> O) <sub>8</sub> | 80        | 1        | 12        | > 99           | 2.7                 | 44               |

<sup>a</sup> The catalytic results about yield and TOF are according to cited references or calculated from respective crystallographic data.



**Table S6.** Sizes of epoxides selected for the experiments.

| Epoxides                      | Size (Å <sup>3</sup> ) |
|-------------------------------|------------------------|
| Propylene oxide               | 6.1 × 4.4 × 5.0        |
| Epichlorohydrin               | 7.2 × 5.6 × 5.1        |
| Styrene oxide                 | 9.3 × 6.9 × 4.6        |
| 1,2-epoxy-3-phenoxypropane    | 12.5 × 7.1 × 5.4       |
| Glycidyl-2-methylphenyl ether | 12.6 × 7.8 × 5.2       |
| Cyclohexene oxide             | 6.5 × 7.0 × 5.0        |

**Table S7.** ICP-OES analysis of Cu<sup>2+</sup> and In<sup>3+</sup> after the 4 times recycled reaction.

| Catalyst   | Cu <sup>2+</sup> concentration (ppm) | In <sup>3+</sup> concentration (ppm) |
|------------|--------------------------------------|--------------------------------------|
| JLU-MOF108 | 0.0277                               | 0.0124                               |

## References

1. X. Duan, Y. Cui, Y. Yang and G. Qian, A novel methoxy-decorated metal–organic framework exhibiting high acetylene and carbon dioxide storage capacities, *CrystEngComm.*, 2017, **19**, 1464-1469.
2. G. Cai, M. Ding, Q. Wu and H. L. Jiang, Encapsulating soluble active species into hollow crystalline porous capsules beyond integration of homogeneous and heterogeneous catalysis, *Natl Sci Rev.*, 2020, **7**, 37-45.
3. B. Liu, S. Yao, C. Shi, G. Li, Q. Huo and Y. Liu, Significant enhancement of gas uptake capacity and selectivity via the judicious increase of open metal sites and Lewis basic sites within two polyhedron-based metal-organic frameworks, *Chem. Commun.*, 2016, **52**, 3223-3226.
4. Y. G. Lee, H. R. Moon, Y. E. Cheon and M. P. Suh, A comparison of the H<sub>2</sub> sorption capacities of isostructural metal-organic frameworks with and without accessible metal sites: [Zn<sub>2</sub>(abtc)(dmf)<sub>23</sub>] and [Cu<sub>2</sub>(abtc)(dmf)<sub>23</sub>] versus [Cu<sub>2</sub>(abtc)<sub>3</sub>], *Angew. Chem. Int. Ed.*, 2008, **47**, 7741-7745.
5. Y. Wang, X. Jia, H. Yang, Y. Wang, X. Chen, A. N. Hong, J. Li, X. Bu and P. Feng, A strategy for constructing pore-space-partitioned mofs with high uptake capacity for C<sub>2</sub> hydrocarbons and CO<sub>2</sub>, *Angew. Chem. Int. Ed.*, 2020, **59**, 19027-19030.
6. T. Xu, M. Jia, X. Liu, J. Li and Y. Liu, Designing multicomponent metal-organic frameworks with hierarchical structure-mimicking distribution for high CO<sub>2</sub> capture performance, *Inorg. Chem.*, 2022, **61**, 7663-7670.
7. X. Zhao, X. Bu, Q. G. Zhai, H. Tran and P. Feng, Pore space partition by symmetry-matching regulated ligand insertion and dramatic tuning on carbon dioxide uptake, *J. Am. Chem. Soc.*, 2015, **137**, 1396-1399.
8. J. Qin, D. Du, W. Li, J. Zhang, S. Li, Z. Su, X. Wang, Q. Xu, K. Shao and Y. Lan, N-rich zeolite-like metal–organic framework with sodalite topology: high CO<sub>2</sub> uptake, selective gas adsorption and efficient drug delivery, *Chem. Sci.*, 2012, **3**, 2114-2118.
9. S. Kim, J. Kim, H. Kim, H. Cho and W. Ahn, Adsorption/catalytic properties of MIL-125 and NH<sub>2</sub>-MIL-125, *Catal. Today*, 2013, **204**, 85-93.

10. Z. Jiang, H. Wang, Y. Hu, J. Lu and H. Jiang, Polar group and defect engineering in a metal-organic framework: synergistic promotion of carbon dioxide sorption and conversion, *ChemSusChem.*, 2015, **8**, 878-885.
11. D. Hong and M. Suh, Enhancing CO<sub>2</sub> separation ability of a metal-organic framework by post-synthetic ligand exchange with flexible aliphatic carboxylates, *Chem. Eur. J.*, 2014, **20**, 426-434.
12. H. Choi and M. Suh, Highly selective CO<sub>2</sub> capture in flexible 3D coordination polymer networks, *Angew. Chem. Int. Ed.*, 2009, **48**, 6865-6869.
13. P. Liao, D. Zhou, A. Zhu, L. Jiang, R. Lin, J. Zhang and X. Chen, Strong and dynamic CO<sub>2</sub> sorption in a flexible porous framework possessing guest chelating claws, *J. Am. Chem. Soc.*, 2012, **134**, 17380-17383.
14. G. Chakraborty, P. Das and S. Mandal, Efficient and highly selective CO<sub>2</sub> capture, separation, and chemical conversion under ambient conditions by a polar-group-appended copper(II) metal-organic framework, *Inorg. Chem.*, 2021, **60**, 5071-5080.
15. G. Zhang, G. Wei, Z. Liu, S. Oliver and H. Fei, A robust sulfonate-based metal-organic framework with permanent porosity for efficient CO<sub>2</sub> capture and conversion, *Chem. Mater.*, 2016, **28**, 6276-6281.
16. Z. Xiang, Z. Hu, D. Cao, W. Yang, J. Lu, B. Han and W. Wang, Metal-organic frameworks with incorporated carbon nanotubes: improving carbon dioxide and methane storage capacities by lithium doping, *Angew. Chem. Int. Ed.*, 2011, **50**, 491-494.
17. S. Nandi, P. Luna, T. Daff, J. Rother, M. Liu, W. Buchanan, A. Hawari, T. Woo and R. Vaidyanathan, A single-ligand ultra-microporous MOF for precombustion CO<sub>2</sub> capture and hydrogen purification, *Sci. Adv.*, 2015, **1**, e1500421.
18. L. Valenzano, B. Civalleri, K. Sillar and J. Sauer, Heats of adsorption of CO and CO<sub>2</sub> in metal-organic frameworks: quantum mechanical study of CPO-27-M (M = Mg, Ni, Zn), *J. Phys. Chem. C.*, 2011, **115**, 21777-21784.
19. S. Mukherjee, N. Sikdar, D. O'Nolan, D. Franz, V. Gascon, A. Kumar, N. Kumar, H. Scott, D. Madden, P. Kruger, B. Space and M. Zaworotko, Trace CO<sub>2</sub> capture by an ultramicroporous physisorbent with low water affinity, *Sci. Adv.*, 2019, **5**, eaax9171.
20. M. Mohamed, I. Elzeny, J. Samuel, W. Xu, C. Malliakas, Y. Picard, T. Pham, L. Miller, A. Hogan, B. Space, D. Hopkinson and S. Elsaidi, Turning normal to abnormal: reversing CO<sub>2</sub>/C<sub>2</sub>-hydrocarbon selectivity in HKUST-1, *Adv. Funct. Mater.*, 2024, DOI: 10.1002/adfm.202312280.
21. J. Cao, S. Mukherjee, T. Pham, Y. Wang, T. Wang, T. Zhang, X. Jiang, H. Tang, K. Forrest, B. Space, M. Zaworotko and K. Chen, One-step ethylene production from a four-component gas mixture by a single physisorbent, *Nat. Commun.*, 2021, **12**, 6507.
22. C. Hao, H. Ren, H. Zhu, Y. Chi, W. Zhao, X. Liu and W. Guo, CO<sub>2</sub>-favored metal-organic frameworks SU-101(M) (M=Bi, In, Ga, and Al) with inverse and high selectivity of CO<sub>2</sub> from C<sub>2</sub>H<sub>2</sub> and C<sub>2</sub>H<sub>4</sub>, *Sep. Purif. Technol.*, 2022, 290, 120804.
23. W. Fan, S. Yuan, W. Wang, L. Feng, X. Liu, X. Zhang, X. Wang, Z. Kang, F. Dai, D. Yuan, D. Sun and H. Zhou, Optimizing Multivariate Metal-Organic Frameworks for Efficient C<sub>2</sub>H<sub>2</sub>/CO<sub>2</sub> Separation, *J Am Chem Soc.*, 2020, **142**, 8728-8737.
24. D. Madden, D. O'Nolan, K. Chen, C. Hua, A. Kumar, T. Pham, K. Forrest, B. Space, J. Perry, M. Khraisheh and M. Zaworotko, Highly selective CO<sub>2</sub> removal for one-step liquefied natural

- gas processing by physisorbents, *Chem. Commun.*, 2019, **55**, 3219-3222.
25. L. Zhang, L. Song, L. Meng, Y. Guo, X. Zhu, L. Qin, C. Chen, X. Xiong, Z. Wei and C. Su, Anionic Ni-based metal-organic framework with Li(I) cations in the pores for efficient C<sub>2</sub>H<sub>2</sub>/CO<sub>2</sub> separation, *ACS Appl. Mater. Interfaces*, 2023, **16**, 847-852.
  26. L. Wang, W. Sun, Y. Zhang, N. Xu, R. Krishna, J. Hu, Y. Jiang, Y. He and H. Xing, Interpenetration symmetry control within ultramicroporous robust boron cluster hybrid MOFs for benchmark purification of acetylene from carbon dioxide, *Angew. Chem. Int. Ed.*, 2021, **60**, 22865-22870.
  27. S. Couck, J. Denayer, G. Baron, T. Remy, J. Gascon and F. Kapteijn, An amine-functionalized MIL-53 metal-organic framework with large separation power for CO<sub>2</sub> and CH<sub>4</sub>, *J. Am. Chem. Soc.*, 2009, **131**, 6326-6327.
  28. X. Jiang, T. Pham, J. Cao, K. Forrest, H. Wang, J. Chen, Q. Zhang and K. Chen, Molecular sieving of acetylene from ethylene in a rigid ultra-microporous metal organic framework, *Chem. Eur. J.*, 2021, **27**, 9446-9453.
  29. J. Zhu, P. Usov, W. Xu, P. Celis-Salazar, S. Lin, M. Kessinger, C. Landaverde-Alvarado, M. Cai, A. May, C. Slebodnick, D. Zhu, S. Senanayake and A. Morris, A new class of metal-cyclam-based zirconium metal-organic frameworks for CO<sub>2</sub> adsorption and chemical fixation, *J. Am. Chem. Soc.*, 2018, **140**, 993-1003.
  30. Q. Sun, Y. Jin, B. Aguila, X. Meng, S. Ma and F. S. Xiao, Porous ionic polymers as a robust and efficient platform for capture and chemical fixation of atmospheric CO<sub>2</sub>, *ChemSusChem*, 2017, **10**, 1160-1165.
  31. J. Zhu, J. Liu, Y. Machain, B. Bonnett, S. Lin, M. Cai, M. Kessinger, P. Usov, W. Xu, S. Senanayake, D. Troya, A. Esker and A. Morris, Insights into CO<sub>2</sub> adsorption and chemical fixation properties of VPI-100 metal-organic frameworks, *J. Mater. Chem. A*, 2018, **6**, 22195-22203.
  32. Z. Gao, L. Liang, X. Zhang, P. Xu and J. Sun, Facile one-pot synthesis of Zn/Mg-MOF-74 with unsaturated coordination metal centers for efficient CO<sub>2</sub> adsorption and conversion to cyclic carbonates, *ACS Appl. Mater. Interfaces*, 2021, **13**, 61334-61345.
  33. X. Yu, J. Gu, X. Liu, Z. Chang and Y. Liu, Exploring the Effect of Different Secondary Building Units as Lewis Acid Sites in MOF Materials for the CO<sub>2</sub> Cycloaddition Reaction, *Inorg. Chem.*, 2023, **62**, 11518-11527.
  34. A. Gogia and S. K. Mandal, Topologically Driven Pore/Surface Engineering in a Recyclable Microporous Metal-Organic Vessel Decorated with Hydrogen-Bond Acceptors for Solvent-Free Heterogeneous Catalysis, *ACS Appl. Mater. Interfaces*, 2022, **14**, 27941-27954.
  35. S. Yuan, L. Zou, H. Li, Y. Chen, J. Qin, Q. Zhang, W. Lu, M. Hall and H. Zhou, Flexible zirconium metal-organic frameworks as bioinspired switchable catalysts, *Angew. Chem. Int. Ed.*, 2016, **55**, 10776-10780.
  36. Z. Xu, Y. Zhao, L. Chen, C. Zhu, P. Li, W. Gao, J. Li and X. Zhang, Thermally activated bipyridyl-based Mn-MOFs with Lewis acid-base bifunctional sites for highly efficient catalytic cycloaddition of CO<sub>2</sub> with epoxides and Knoevenagel condensation reactions, *Dalton. Trans.*, 2023, **52**, 3671-3681.
  37. J. Liang, Y. Xie, X. Wang, Q. Wang, T. Liu, Y. Huang and R. Cao, An imidazolium-functionalized mesoporous cationic metal-organic framework for cooperative CO<sub>2</sub> fixation into cyclic carbonate, *Chem. Commun.*, 2018, **54**, 342-345.

38. D. Ma, Y. Zhang, S. Jiao, J. Li, K. Liu and Z. Shi, A tri-functional metal-organic framework heterogeneous catalyst for efficient conversion of CO<sub>2</sub> under mild and co-catalyst free conditions, *Chem. Commun.*, 2019, **55**, 14347-14350.
39. M. Feng, X. Zhou, X. Wang, P. Zhou, J. Wang, Z. Cheng and D. Wang, Two stable sodalite-cage-based mofs for highly gas selective capture and conversion in cycloaddition reaction, *ACS Appl. Mater. Interfaces*, 2023, **15**, 11837-11844.
40. A. Bhardwaj, J. Kaur, M. Wuest and F. Wuest, In situ click chemistry generation of cyclooxygenase-2 inhibitors, *Nat. Commun.*, 2017, **8**, 1.
41. J. Gu, X. Sun, X. Liu, Y. Yuan, H. Shan and Y. Liu, Highly efficient synergistic CO<sub>2</sub> conversion with epoxide using copper polyhedron-based MOFs with Lewis acid and base sites, *Inorg. Chem. Front.*, 2020, **7**, 4517-4526.
42. J. Kurisingal, Y. Rachuri, Y. Gu, R. Chitumalla, S. Vuppala, J. Jang, K. Bisht, E. Suresh and D. Park, Facile green synthesis of new copper-based metal-organic frameworks: experimental and theoretical study of the CO<sub>2</sub> fixation reaction, *ACS Sustain. Chem. Eng.*, 2020, **8**, 10822–10832.
43. B. Parmar, P. Patel, R. Kureshy, N. Khan and E. Suresh, Sustainable heterogeneous catalysts for CO<sub>2</sub> utilization by using dual ligand Zn(II) /Cd(II) metal-organic frameworks, *Chem. Eur. J.*, 2018, **24**, 15831-15839.
44. J. Dong, P. Cui, P. F. Shi, P. Cheng and B. Zhao, Ultrastrong alkali-resisting lanthanide-zeolites assembled by [Ln<sub>60</sub>] Nanocages, *J. Am. Chem. Soc.*, 2015, **137**, 15988-15991.
